# Supplementary material for: Chromosome position effects on gene expression in Escherichia coli K-12
Source: PubMed Central journal article supplement (PMC4191405; doi:10.1093/nar/gku828), 2014-09-10
Supplement: supp_gku828_nar-02154-h-2014-File008.pdf [file supp_gku828_nar-02154-h-2014-File008.pdf]

# Chromosome Position Effects on Gene Expression in *Escherichia coli* K-12

Jack A. Bryant, Laura E. Sellars, Stephen J. W. Busby, David J. Lee\*

## SUPPLEMENTARY FIGURES AND TABLES

\*Corresponding Author  
Institute of Microbiology and Infection,  
School of Biosciences,  
University of Birmingham,  
Edgbaston,  
Birmingham,  
United Kingdom.  
Telephone: +44 (0)121 41 45439  
Email: [D.lee@bham.ac.uk](mailto:D.lee@bham.ac.uk)

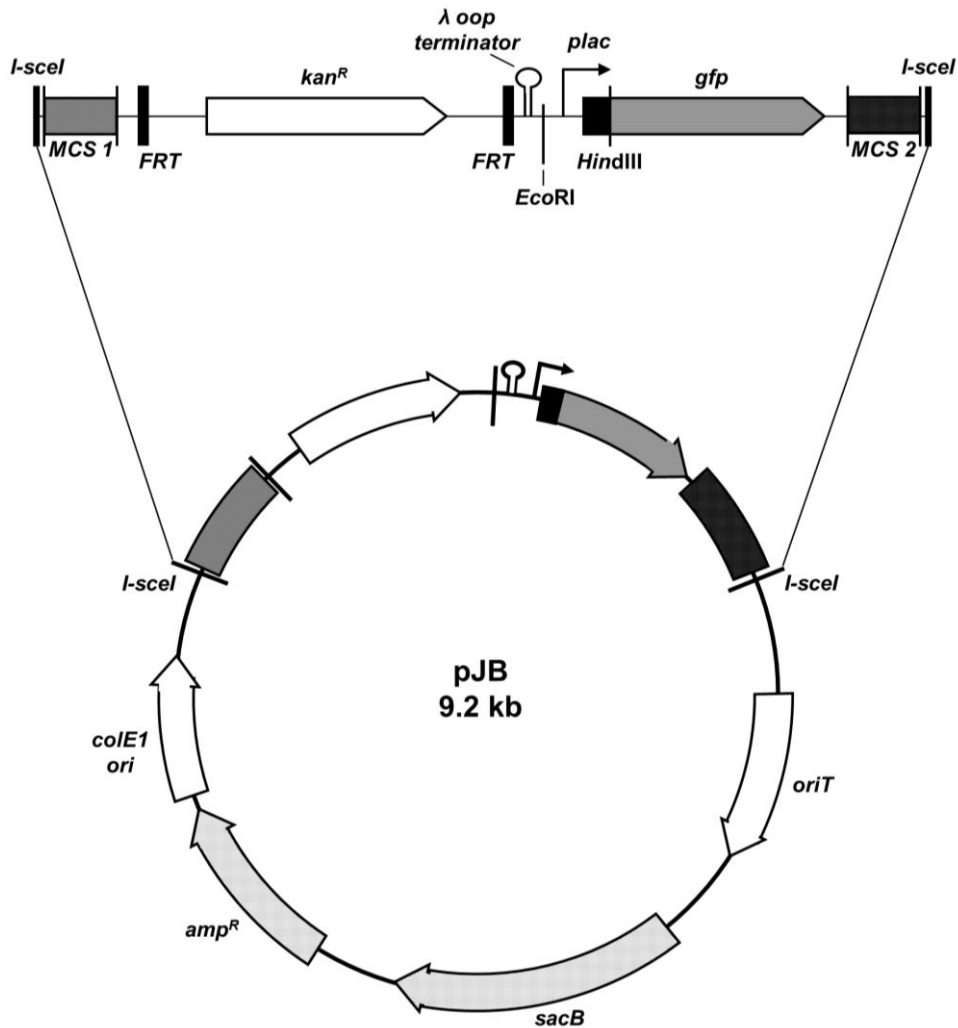

**Figure S1.** Map of the reporter cassette donor plasmid, pJB. The pJB series of plasmids are derivatives of the pDOC-C gene doctoring plasmid and are used to insert the *lac* promoter::*gfp* reporter cassette at any desired position of the *E. coli* chromosome (1). Approximately 500 bp regions of homology, flanking the desired position of insertion on the chromosome, are cloned into the multiple cloning sites MCS 1 and MCS 2, which flank the reporter cassette. The FRT flanked kanamycin resistance cassette (*kan<sup>R</sup>*) and  $\lambda$  *oop* transcription terminator (Stem-loop) of pKH5 are included upstream of the fusion to allow selection of recombinants and prevention of transcriptional read-through from neighbouring operons (2). The *kan<sup>R</sup>* can be excised from the chromosome by Flp recombinase acting at the FRT sites. The plasmid carries the sucrose sensitivity gene (*sacB*) allowing selection against retention of the donor plasmid. The pJB plasmids also carry an ampicillin resistance gene (*amp<sup>R</sup>*) and origins of replication (*colE1 ori*, *oriT*).



**Figure S2.** DNA base sequence of the reporter cassette in plasmid pJB. The *I-SceI* DNA target recognition sites are double underlined and labelled. Restriction endonuclease target sites are boxed and labelled. The FLP recognition targets (FRT) DNA sites are shaded grey and labelled. ATG start codon and open reading frames are in capitals with the start and stop codons in bold and underlined. The kanamycin resistance (*kan<sup>R</sup>*) and *gfp* genes are labelled in uppercase. The *lacZ* start codon and the *lacZ* gene are shown in bold capitals with the Shine-Dalgarno sequence underlined. The promoter -10 and -35 are underlined, with the transcription start site (+1) bold and underlined. The *lacI* operator sequences are boxed and labelled and the DNA site for CRP is double underlined. Additional stop codons in different reading frames were included and are denoted by an X.

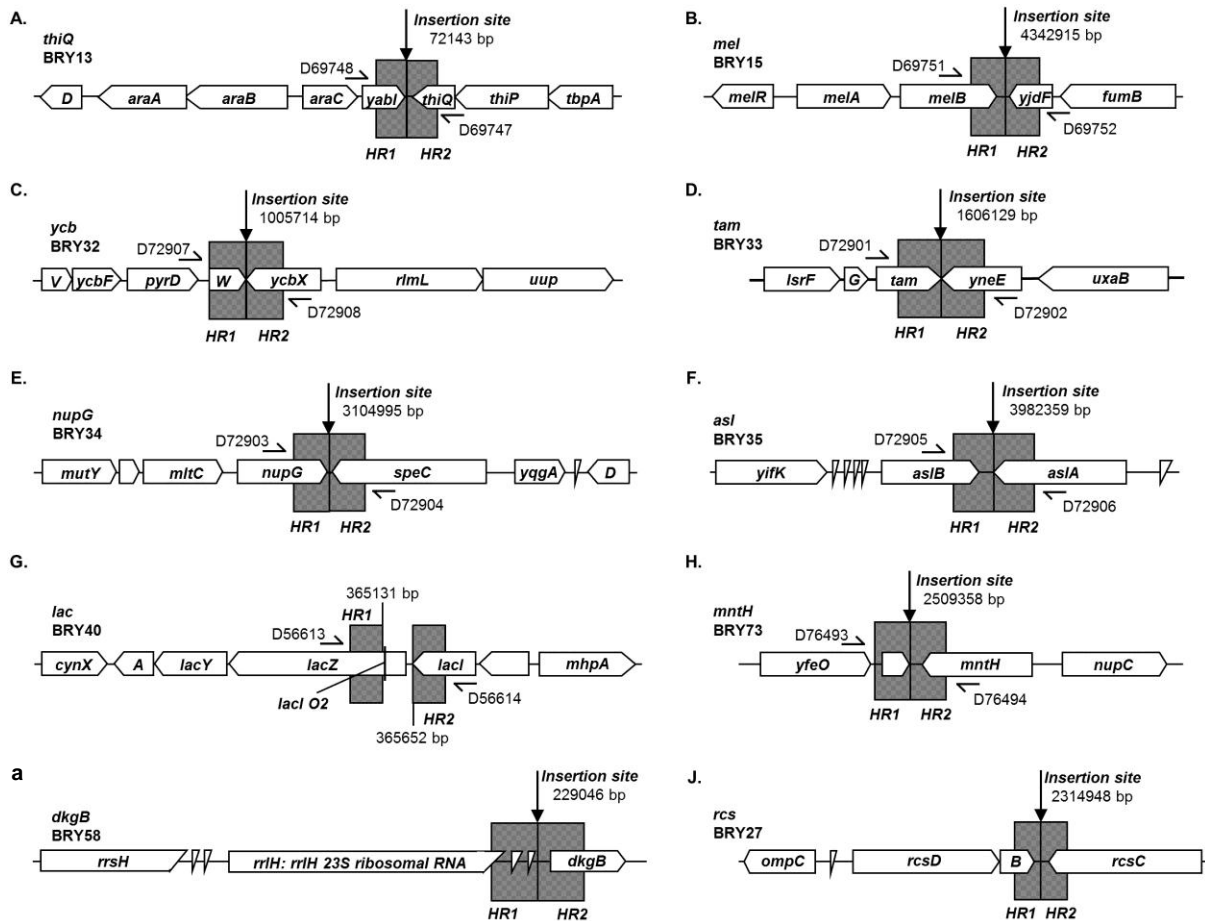

**Figure S3.** Schematic diagram of gene organisation at reporter cassette insertion sites. Reporter cassette insertion sites (A –J) with corresponding neighbouring gene name and the name of the derivative BRY strain that was generated. Genes are represented by white block arrows and RNA coding regions represented by white triangles. Insertion sites and the precise base pair position on the chromosome are indicated. Regions of homology, used for insertion of the reporter cassette, are shown as grey shaded boxes, labelled *HR1* and *HR2*.

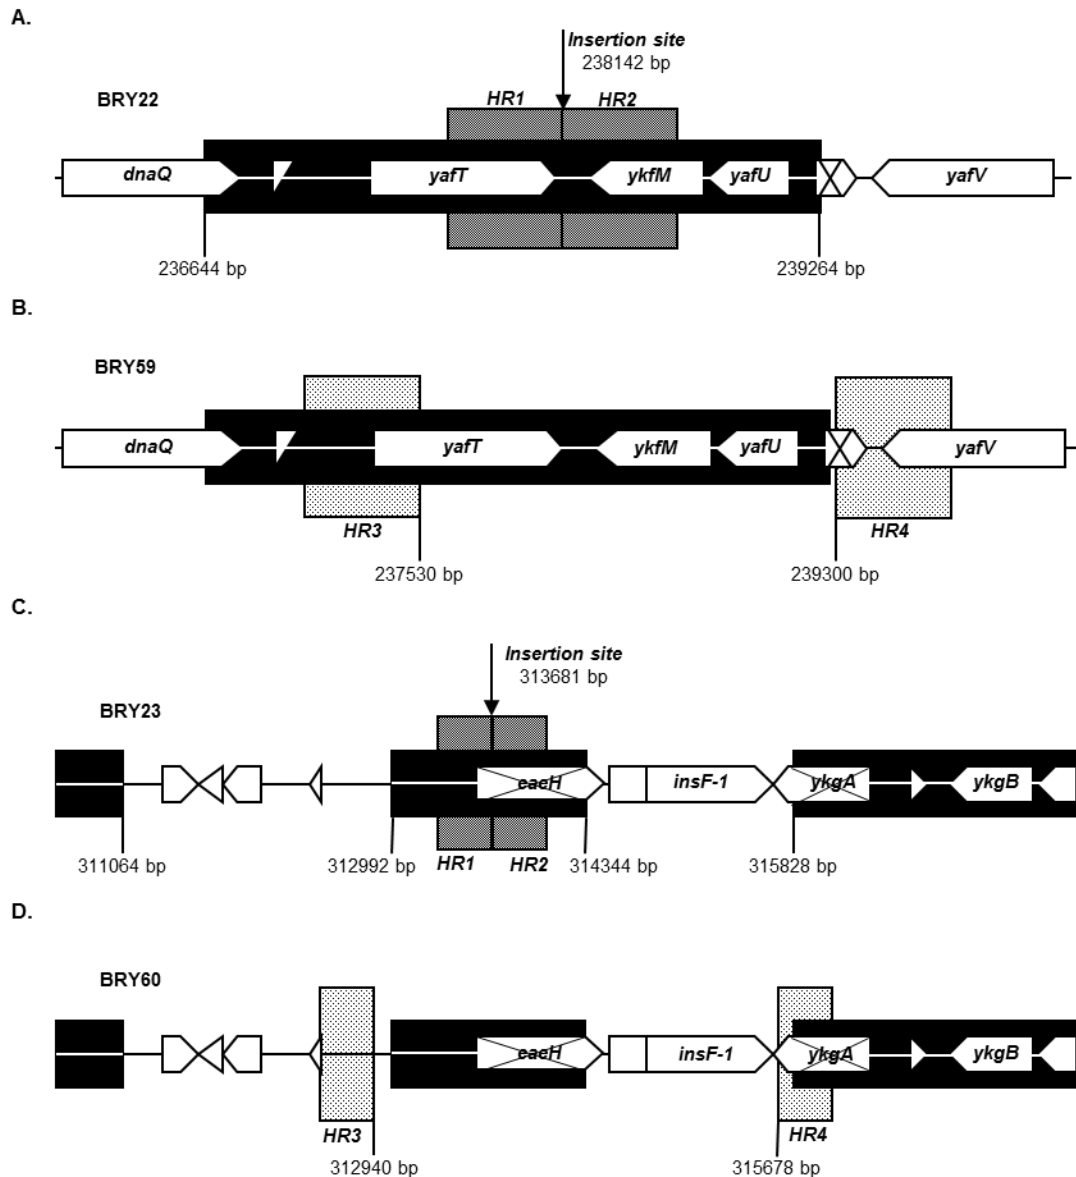

**Figure S4.** Schematic diagram of *tsEPOD* reporter cassette insertion sites. Organisation of genes at the *yafT* (A,B) and *eaeH* (C,D) loci. Genes are represented by white block arrows and white triangles represent RNA coding regions. Crossed boxes represent pseudogenes. Black boxes represent the position of transcriptionally silent extended protein occupancy domains (*tsEPOD*). The insertion site within the *tsEPOD* at the *yafT* (A) and *eaeH* (C) loci are indicated. Homology regions used for recombineering are shown as grey shaded boxes, labelled *HR1* and *HR2*. For *tsEPOD* replacement at the *yafT* (B) and *eaeH* (D) loci, homology regions *HR3* and *HR4* (grey shaded boxes) were used for recombineering. The name of the derivative BRY strain that was generated is indicated.

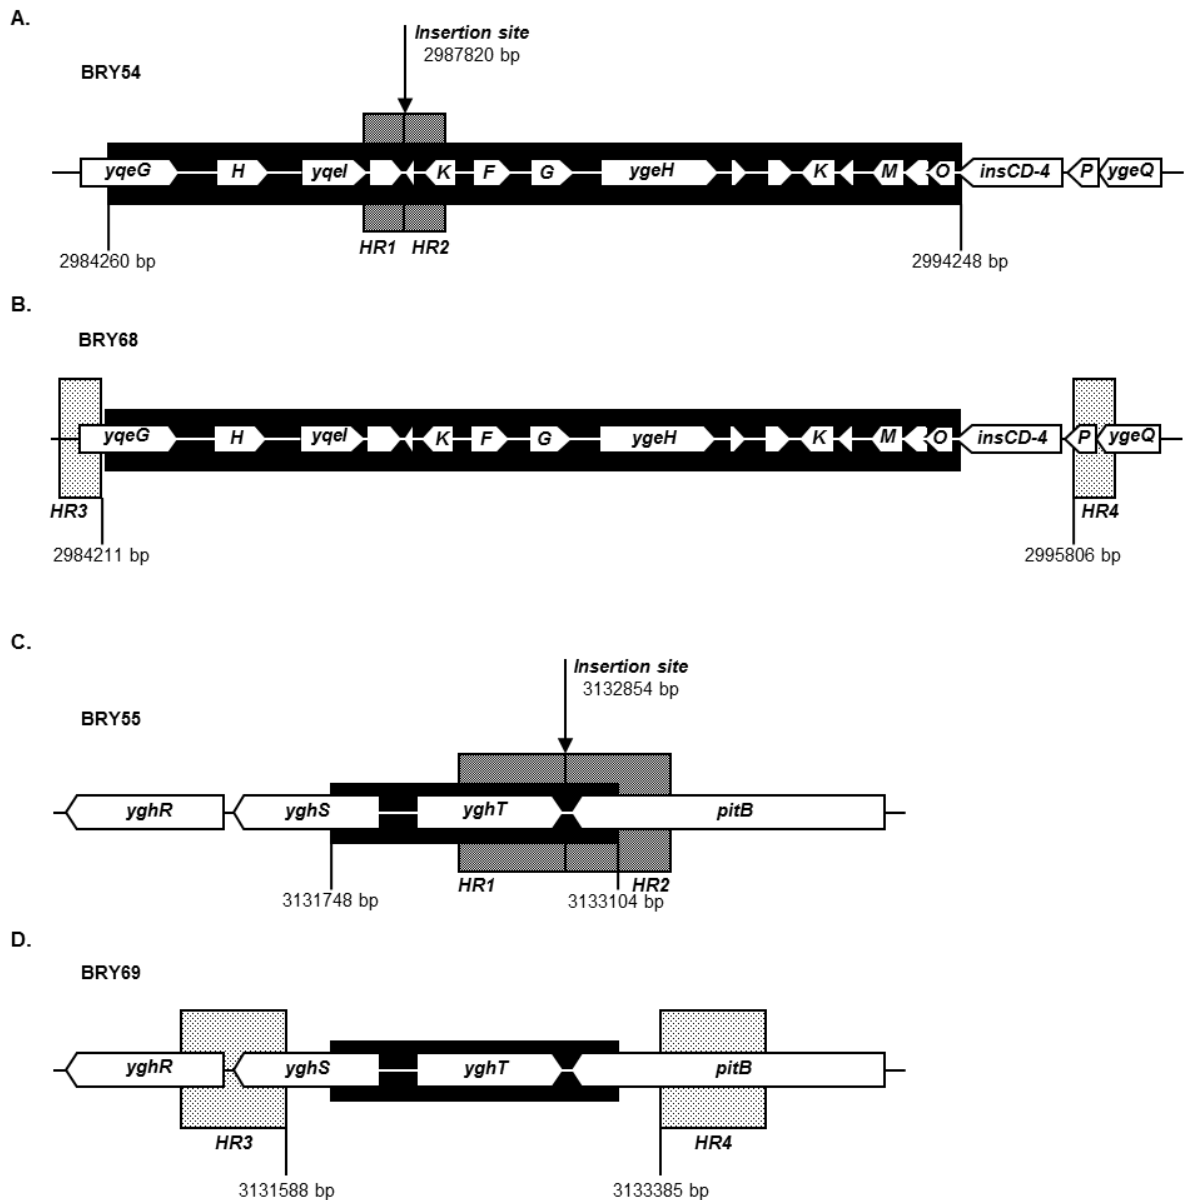

**Figure S5.** Schematic diagram of *tsEPOD* reporter cassette insertion sites. Organisation of genes at the *yqe* (**A**, **B**) and *pitB* (**C**, **D**) loci. Genes are represented by white block arrows. Black boxes represent the position of transcriptionally silent extended protein occupancy domains (*tsEPOD*). The insertion site within the *tsEPOD* at the *yqe* (**A**) and *pitB* (**C**) loci are indicated. Homology regions used for recombineering are shown as grey shaded boxes, labelled *HR1* and *HR2*. For *tsEPOD* replacement at the *yqe* (**B**) and *pitB* (**D**) loci, homology regions *HR3* and *HR4* (grey shaded boxes) were used for recombineering. The name of the derivative BRY strain that was generated is indicated.

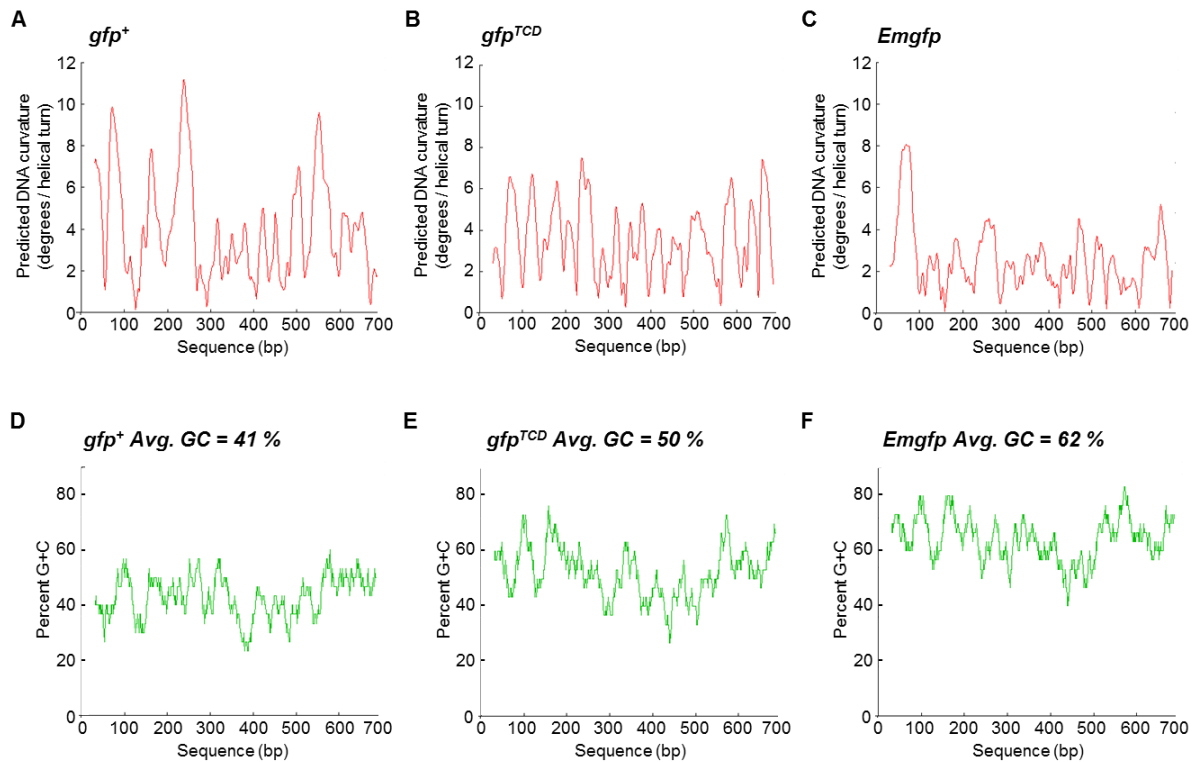

**Figure S6.** Curvature prediction and GC content of different *gfp* genes. The gene sequence of Emerald GFP (*Emgfp*) was compared with the sequences of *gfp+* and *gfp*<sup>TCD</sup>. The derivative *gfp*<sup>TCD</sup> was previously shown to be less curved and to contain a higher percentage of GC bps compared to *gfp+* making it less favourable for H-NS binding. Curvature predictions (A-C) and G+C content plots (D-F) for the *gfp+*, *gfp*<sup>TCD</sup> and *Emgfp* sequences were created using the Bend.it server ([http://hydra.icgeb.trieste.it/dna/bend\\_form.html](http://hydra.icgeb.trieste.it/dna/bend_form.html)), as previously described (3). The curvature parameter used was consensus scale with a curvature window size of 31 and a G+C content window size of 31. The plot type is one dimensional with no smoothing applied.



**Table S1. *E. coli* strains used in this study**

| Strain | Description *                                                                                                                                                                                           | Origin     |
|--------|---------------------------------------------------------------------------------------------------------------------------------------------------------------------------------------------------------|------------|
| MG1655 | <i>E. coli</i> K12 strain                                                                                                                                                                               | (4)        |
| BRY09  | Derivative of MG1655 carrying a <i>kan</i> gene and <i>lac::gfp</i> fusion at position 72143 bp ( <i>thiQ</i> locus)                                                                                    | This study |
| BRY11  | Derivative of MG1655 carrying a <i>kan</i> gene and <i>lac::gfp</i> fusion at position 4342915 bp ( <i>mel</i> locus)                                                                                   | This study |
| BRY13  | Derivative of BRY09, from which the <i>kan</i> gene has been removed. Position 72143 bp ( <i>thiQ1</i> locus)                                                                                           | This study |
| BRY15  | Derivative of BRY11, from which the <i>kan</i> gene has been removed. Position 4342915 bp ( <i>mel1</i> locus)                                                                                          | This study |
| BRY17  | Derivative of MG1655 carrying a <i>kan</i> gene and <i>lac::gfp</i> fusion at position 72143 bp in the opposite orientation to that of BRY09. <i>yabI&lt;kan lac::gfp&gt;thiQ</i> ( <i>thiQ2</i> locus) | This study |
| BRY18  | Derivative of MG1655 carrying a <i>kan</i> gene and <i>lac::gfp</i> fusion at position 238142 bp ( <i>yafT</i> locus)                                                                                   | This study |
| BRY19  | Derivative of MG1655 carrying a <i>kan</i> gene and <i>lac::gfp</i> fusion at position 313681 bp ( <i>eaeH</i> locus)                                                                                   | This study |
| BRY21  | Derivative of BRY17, from which the <i>kan</i> gene has been removed. Position 72143 bp ( <i>thiQ2</i> locus)                                                                                           | This study |
| BRY22  | Derivative of BRY18, from which the <i>kan</i> gene has been removed. Position 238142 bp ( <i>yafT</i> locus)                                                                                           | This study |
| BRY23  | Derivative of BRY19, from which the <i>kan</i> gene has been removed. Position 313681 bp ( <i>eaeH</i> locus)                                                                                           | This study |
| BRY26  | Derivative of MG1655 carrying a <i>kan</i> gene and <i>lac::gfp</i> fusion at position 2314948 bp ( <i>rsc</i> locus)                                                                                   | This study |
| BRY27  | Derivative of BRY26, from which the <i>kan</i> gene has been removed. Position 2314948 bp ( <i>rsc</i> locus)                                                                                           | This study |
| BRY28  | Derivative of MG1655 carrying a <i>kan</i> gene and <i>lac::gfp</i> fusion at position 1005714 bp ( <i>ycb</i> locus)                                                                                   | This study |
| BRY29  | Derivative of MG1655 carrying a <i>kan</i> gene and <i>lac::gfp</i> fusion at position 1606129 bp ( <i>tam</i> locus)                                                                                   | This study |
| BRY30  | Derivative of MG1655 carrying a <i>kan</i> gene and <i>lac::gfp</i> fusion at position 3104995 bp ( <i>nupG</i> locus)                                                                                  | This study |

**Table S1. *E. coli* strains used in this study (continued)**

| Strain | Description *                                                                                                                                                                                                  | Origin     |
|--------|----------------------------------------------------------------------------------------------------------------------------------------------------------------------------------------------------------------|------------|
| BRY31  | Derivative of MG1655 carrying a <i>kan</i> gene and <i>lac::gfp</i> fusion at position 3982359 bp ( <i>asl</i> locus)                                                                                          | This study |
| BRY32  | Derivative of BRY28, from which the <i>kan</i> gene has been removed. Position 1005714 bp ( <i>ycb</i> locus)                                                                                                  | This study |
| BRY33  | Derivative of BRY29, from which the <i>kan</i> gene has been removed. Position 1606129 bp ( <i>tam</i> locus)                                                                                                  | This study |
| BRY34  | Derivative of BRY30, from which the <i>kan</i> gene has been removed. Position 3104995 bp ( <i>nupG</i> locus)                                                                                                 | This study |
| BRY35  | Derivative of BRY31, from which the <i>kan</i> gene has been removed. Position 3982359 bp ( <i>asl</i> locus)                                                                                                  | This study |
| BRY36  | Derivative of MG1655 carrying a <i>kan</i> gene and <i>lac::gfp</i> fusion at position 4342915 bp in the opposite orientation to that of BRY11. <i>melB&lt;gfp::lac kan&gt;yjdF</i> ( <i>mel2</i> locus)       | This study |
| BRY37  | Derivative of BRY36, from which the <i>kan</i> gene has been removed. Position 4342915 bp ( <i>mel2</i> locus)                                                                                                 | This study |
| BRY38  | Derivative of MG1655, in which the <i>lac</i> promoter and the start of the <i>lacZ</i> gene (including <i>lacI O2</i> ) was replaced with a <i>kan</i> gene and <i>lac::gfp</i> fusion ( <i>lac</i> locus)    | This study |
| BRY39  | Derivative of MG1655 carrying a <i>kan</i> gene and <i>lac::gfp</i> fusion at position 365131-365652 bp in the opposite orientation to that of BRY38. <i>lacZ&lt;kan lac::gfp&gt;lacI</i> ( <i>lac2</i> locus) | This study |
| BRY40  | Derivative of BRY38, from which the <i>kan</i> gene has been removed. Position 365131 - 365652 bp ( <i>lac</i> locus)                                                                                          | This study |
| BRY41  | Derivative of BRY39, from which the <i>kan</i> gene has been removed. Position 365131 - 365652 bp ( <i>lac2</i> locus)                                                                                         | This study |
| BRY47  | Derivative of MG1655 carrying a <i>kan</i> gene and <i>lac::gfp</i> fusion at position 2987820 bp ( <i>yqe</i> locus)                                                                                          | This study |
| BRY48  | Derivative of MG1655 carrying a <i>kan</i> gene and <i>lac::gfp</i> fusion at position 3132854 bp ( <i>pitB</i> locus)                                                                                         | This study |
| BRY51  | Derivative of MG1655 carrying a <i>kan</i> gene and <i>lac::gfp</i> fusion at position 229046 bp ( <i>dkgB</i> locus)                                                                                          | This study |
| BRY52  | Derivative of MG1655 carrying a <i>kan</i> gene and <i>lac::gfp</i> fusion at position 237530-239300 bp ( <i>ΔyafT</i> locus)                                                                                  | This study |

**Table S1. *E. coli* strains used in this study (continued)**

| Strain | Description *                                                                                                                          | Origin     |
|--------|----------------------------------------------------------------------------------------------------------------------------------------|------------|
| BRY53  | Derivative of MG1655 carrying a <i>kan</i> gene and <i>lac::gfp</i> fusion at position 312940-315678 bp ( <i>ΔeaeH</i> locus)          | This study |
| BRY54  | Derivative of BRY47, from which the <i>kan</i> gene has been removed. Position 2987820 bp ( <i>yqe</i> locus)                          | This study |
| BRY55  | Derivative of BRY48, from which the <i>kan</i> gene has been removed. Position 3132854 bp ( <i>pitB</i> locus)                         | This study |
| BRY58  | Derivative of BRY51, from which the <i>kan</i> gene has been removed. Position 229046 bp ( <i>dkgB</i> locus)                          | This study |
| BRY59  | Derivative of BRY52, from which the <i>kan</i> gene has been removed. Position 237530 - 239300 bp ( <i>ΔyafT</i> locus)                | This study |
| BRY60  | Derivative of BRY53, from which the <i>kan</i> gene has been removed. Position 312940 - 315678 bp ( <i>ΔeaeH</i> locus)                | This study |
| BRY61  | Derivative of MG1655 carrying a <i>kan</i> gene and <i>lac::gfp</i> fusion at position 2984331 - 2995806 bp ( <i>Δyqe</i> locus)       | This study |
| BRY62  | Derivative of MG1655 carrying a <i>kan</i> gene and <i>lac::gfp</i> fusion at position 3131588 - 3133385 bp ( <i>ΔpitB</i> locus)      | This study |
| BRY66  | Derivative of MG1655 carrying a <i>kan</i> gene and <i>lac::gfp</i> fusion at position 2509358 bp ( <i>mntH</i> locus)                 | This study |
| BRY68  | Derivative of BRY61, from which the <i>kan</i> gene has been removed. Position 2984331 - 2995806 bp ( <i>Δyqe</i> locus)               | This study |
| BRY69  | Derivative of BRY62, from which the <i>kan</i> gene has been removed. Position 3131588 - 3133385 bp ( <i>ΔpitB</i> locus)              | This study |
| BRY73  | Derivative of BRY66, from which the <i>kan</i> gene has been removed. Position 2509358 bp ( <i>mntH</i> locus)                         | This study |
| BRY75  | Lac <sup>-</sup> derivative of BRY15, in which the wild type <i>lac</i> promoter has been replaced by the cloning site of plasmid pKH3 | This study |
| BRY79  | Lac <sup>-</sup> derivative of BRY37, in which the wild type <i>lac</i> promoter has been replaced by the cloning site of plasmid pKH3 | This study |

\* Position refers to location of the insert in the *E. coli* genome in base pairs (bp) with respect to the coordinate-system origin

**Table S2. Oligonucleotides used in this study**

| Name   | Sequence (5' – 3') <sup>1</sup>      | Use                                                                                                                                                                |
|--------|--------------------------------------|--------------------------------------------------------------------------------------------------------------------------------------------------------------------|
| D54890 | TGAAGGGCAATCAGCTGTTG                 | Anneals to 3' end of <i>lacI</i> gene, upstream of cloning site in pKH3. Used for sequencing inserts in pKH3.                                                      |
| D55668 | GAGCGGCGACGATAGTCATG                 | Anneals downstream of <i>SalI</i> site in pBR322. Used for sequencing inserts in pBR322 during construction of pKH3 and pJB plasmids.                              |
| D10520 | CCCTGCGGTGCCCCTCAAG                  | Anneals upstream of <i>EcoRI</i> site in pRW50. Used for sequencing and amplification of inserts in this vector.                                                   |
| D56613 | CTTGATGTCTCTGACCAGAC                 | Anneals within the <i>lacI</i> sequence outside of the pKH3 homology. Used for screening gene gorging candidates by PCR amplification.                             |
| D56614 | TTATGCAGCAACGAGACGTC                 | Anneals within the <i>lacZ</i> sequence outside of the pKH3 homology. Used for screening gene gorging candidates by PCR amplification.                             |
| D68556 | TTTACGTCGCCGTCCAG                    | Anneals downstream of the start codon of <i>gfp</i> . Used for sequencing promoter inserts in pJB plasmid derivatives and BRY strains.                             |
| D58793 | GGATGTGCTGCAAGG                      | Sequencing primer to check homology regions inserted between <i>NheI</i> and <i>SacI</i> . Binds downstream of <i>I-sceI</i> site                                  |
| D58794 | TATGCTTCCGGCTCG                      | Sequencing primer to check homology regions inserted between <i>MfeI</i> and <i>XmaI</i> . Binds downstream of <i>I-sceI</i> site                                  |
| D67847 | TACGCAATTGATTACCCTGTT<br>ATCCCTAG    | Anneals to the <i>SceI</i> site upstream of the <i>lacI</i> homology in pKH5 and incorporates an <i>MfeI</i> site. Used with D67848 to create pJB1 by inverse PCR. |
| D67848 | GCTACGACCGGTGGCTGGAG<br>CTGCTTCGAAG  | Anneals downstream of the <i>lacI</i> homology in pKH5 and incorporates an <i>AgeI</i> site. Used with D67847 to create pJB1 by inverse PCR.                       |
| D67849 | AATTGTATGCCCGGGTTGT<br>AGGTACCAACTA  | Complementary to D67876 and encodes the pJB1 multiple cloning site.                                                                                                |
| D67876 | CCGGTAGTTGGTACCTACAA<br>CCCGGGGCATAC | Complementary to D67849 and encodes the pJB1 multiple cloning site.                                                                                                |

**Table S2. Oligonucleotides used in this study (continued)**

| Name                                    | Sequence (5' – 3') <sup>1</sup>                                                    | Use                                                                                                                                                                                         |
|-----------------------------------------|------------------------------------------------------------------------------------|---------------------------------------------------------------------------------------------------------------------------------------------------------------------------------------------|
| D67961                                  | TACGA <u>AAGCTT</u> AGCAAGGGCG<br>AGGAGCTG                                         | Anneals to the 5' end of <i>gfp</i> in pDEX-G and incorporates a <i>Hind</i> III site. Used to create pJB2                                                                                  |
| D67962                                  | TACGGT <u>CGACTT</u> GTATGTGT<br><u>ACATT</u> CGTTAGTTACTTACTT<br>GTACAGCTCGTCCATG | Anneals to the 3' end of <i>gfp</i> in pDEX-G and incorporates two extra stop codons in each reading frame, a <i>Bsr</i> GI site and a <i>Sal</i> I site. Used to create pJB2 (Figure 2.8). |
| D68276                                  | CTCGGCATGGACGAGCTT <u>TA</u><br>CAAGTAAGTAACTAAC                                   | Anneals to the 3' end of <i>gfp</i> and incorporates a G→T silent mutation of the <i>Bsr</i> GI site. Used to create pJB2ΔB.                                                                |
| D68277                                  | GTTAGTTACTTACTTGTAA <u>AG</u><br>CTCGTCCATGCCGAG                                   | Anneals to the 3' end of <i>gfp</i> and incorporates a G→T silent mutation of the <i>Bsr</i> GI site. Used to create pJB2ΔB.                                                                |
| D68085                                  | <u>GTACAGCCATAACTAGTACT</u><br><u>TGCTAGCGCACAAAGAGCTCT</u><br>AGGGATAACAGGGTAATG  | Complementary to D68086 and encodes the pJB3 multiple cloning site.                                                                                                                         |
| D68086                                  | TCGACATTACCCTGTTATCCC<br><u>TAGAGCTCTTGTGCGCTAGC</u><br>AAGT <u>ACTAGTTATGGCT</u>  | Complementary to D68085 and encodes the pJB3 multiple cloning site.                                                                                                                         |
| D66948                                  | TATAGA <u>AATTCGGGCAGTGAG</u><br>CGCAACGC                                          | Anneals upstream of <i>O</i> <sup>3</sup> in the <i>lac</i> promoter region and incorporates an <i>Eco</i> RI site. Used to create the <i>lac00</i> and <i>lac</i> fragments.               |
| D68443                                  | GCCGA <u>AAGCTT</u> CATAGCTGTT<br>TCCTGTGTG                                        | Anneals to the <i>lac</i> promoter translation initiation region and incorporates a <i>Hind</i> III site downstream of the ATG. Used with D66948 to amplify <i>lac00</i> to create pJB4.    |
| D69482                                  | GCCGA <u>AAGCTT</u> AAGGCGATTA<br>AGTTGGG                                          | Anneals to <i>lacZ</i> to incorporate a <i>Hind</i> III site immediately downstream of codon 28 to create the <i>lac</i> fragment.                                                          |
| <i>Used to amplify homology regions</i> |                                                                                    |                                                                                                                                                                                             |
| D69231                                  | GCCG <u>CAATTG</u> CCGGGATTGA<br>AACTGAACG                                         | Used to amplify the <i>thiQ</i> homology region and introduce an <i>Mfe</i> I site. Used with D69232. ( <i>thiQ</i> )                                                                       |
| D69232                                  | GCCG <u>CCCGGG</u> CGACGCTTGC<br>CGCGTCTTATC                                       | Used to amplify the <i>thiQ</i> homology region and introduce an <i>Xma</i> I site. Used with D69231. ( <i>thiQ</i> )                                                                       |

**Table S2. Oligonucleotides used in this study (continued)**

| Name   | Sequence (5' – 3') <sup>1</sup>        | Use                                                                                                                         |
|--------|----------------------------------------|-----------------------------------------------------------------------------------------------------------------------------|
| D69233 | GCCGGAGCTCCTGAACATGC<br>GTTGCATCAAC    | Used to amplify the <i>yabI</i> homology region and introduce a <i>SacI</i> site. Used with D69234. ( <i>thiQ</i> )         |
| D69234 | GCCGGCTAGCCATCAGGCAA<br>CCCGCAC        | Used to amplify the <i>yabI</i> homology region and introduce an <i>NheI</i> site. Used with D69233. ( <i>thiQ</i> )        |
| D71381 | GCCGGAGCTCCCGGGATTGA<br>AACTGAACG      | Used to amplify the <i>thiQ</i> homology region and introduce a <i>SacI</i> site. Used with D71382. ( <i>thiQ2</i> )        |
| D71382 | GCCGGCTAGCCGACGCTTGC<br>CGCGTCTTATC    | Used to amplify the <i>thiQ</i> homology region and introduce an <i>NheI</i> site. Used with D71381. ( <i>thiQ2</i> )       |
| D71383 | GCCGCCCGGGCATCAGGCAA<br>CCCGCAC        | Used to amplify the <i>yabI</i> homology region and introduce an <i>XmaI</i> site. Used with D71384. ( <i>thiQ2</i> )       |
| D71384 | GCCGCAATTGCTGAACATGC<br>GTTGCATCAAC    | Used to amplify the <i>yabI</i> homology region and introduce an <i>MfeI</i> site. Used with D71383. ( <i>thiQ2</i> )       |
| D69239 | GCCGCAATTGGATCCAGATC<br>CATCTGCTGG     | Used to amplify the <i>melB</i> homology region and introduce an <i>MfeI</i> site. Used with D69240. ( <i>mel</i> )         |
| D69240 | GCCGCCCGGGTTCCTTATCC<br>GGTCTACAAAATTG | Used to amplify the <i>melB</i> homology region and introduce an <i>XmaI</i> site. Used with D69239. ( <i>mel</i> )         |
| D69241 | GCCGGAGCTCCGTTAACGCC<br>GCTGCTCTATACGC | Used to amplify the <i>yjdF</i> homology region and introduce a <i>SacI</i> site. Used with D69242. ( <i>mel</i> )          |
| D69242 | GCCGGCTAGCTTCACGCCGC<br>ATCCGGC        | Used to amplify the <i>yjdF</i> homology region and introduce an <i>NheI</i> site. Used with D69241. ( <i>mel</i> )         |
| D72989 | GCCGGAGCTCGATCCAGATC<br>CATCTGCTGG     | Used to amplify the <i>melB</i> homology region and introduce a <i>SacI</i> site. Used with D72876. ( <i>Inverse mel</i> )  |
| D72876 | GCCGGCTAGCTTCCTTATCCG<br>GTCTACAAAATTG | Used to amplify the <i>melB</i> homology region and introduce an <i>NheI</i> site. Used with D72989. ( <i>Inverse mel</i> ) |

**Table S2. Oligonucleotides used in this study (continued)**

| Name   | Sequence (5' – 3') <sup>1</sup>                      | Use                                                                                                                             |
|--------|------------------------------------------------------|---------------------------------------------------------------------------------------------------------------------------------|
| D72988 | GCCG <u>CAATTG</u> CGTTAACGCC<br>GCTGCTCTATACGC      | Used to amplify the <i>yjdF</i> homology region and introduce an <i>MfeI</i> site. Used with D72878. ( <i>Inverse mel</i> )     |
| D72878 | GCCG <u>CCCCGGG</u> TTCACGCCGC<br>ATCCGGC            | Used to amplify the <i>yjdF</i> homology region and introduce an <i>XmaI</i> site. Used with D72988. ( <i>Inverse mel</i> )     |
| D71369 | GCCG <u>CAATTG</u> ATATTATACT<br>GTTTCCAC            | Used to amplify the <i>yafT</i> homology region and introduce an <i>MfeI</i> site. Used with D71370. ( <i>yafT</i> )            |
| D71370 | GCCG <u>CCCCGGG</u> TCCTGGCGGC<br>AGATATAATTTATTATTG | Used to amplify the <i>yafT</i> homology region and introduce an <i>XmaI</i> site. Used with D71369. ( <i>yafT</i> )            |
| D71371 | GCCGG <u>CTAGC</u> ATTTCTGGCG<br>GCAATAATAC          | Used to amplify the <i>ykfM</i> homology region and introduce an <i>NheI</i> site. Used with D71372. ( <i>yafT</i> )            |
| D71372 | GCCGG <u>GAGCTC</u> GAGTTAAACC<br>TCTATATTC          | Used to amplify the <i>ykfM</i> homology region and introduce a <i>SacI</i> site. Used with D71371. ( <i>yafT</i> )             |
| D71373 | GCCG <u>CAATTG</u> ATCCATAAAA<br>AATATATTGG          | Used to amplify the upstream <i>eaeH</i> homology region and introduce an <i>MfeI</i> site. Used with D71374. ( <i>eaeH</i> )   |
| D71374 | GCCG <u>CCCCGGG</u> GAAAAAGAA<br>CCTGAACAGAG         | Used to amplify the upstream <i>eaeH</i> homology region and introduce an <i>XmaI</i> site. Used with D71373. ( <i>eaeH</i> )   |
| D71375 | GCCGG <u>CTAGC</u> CACTCGCTGT<br>CACCTTTACC          | Used to amplify the downstream <i>eaeH</i> homology region and introduce an <i>NheI</i> site. Used with D71376. ( <i>eaeH</i> ) |
| D71376 | GCCGG <u>GAGCTC</u> GCACCAACAC<br>CAATGCG            | Used to amplify the downstream <i>eaeH</i> homology region and introduce a <i>SacI</i> site. Used with D71375. ( <i>eaeH</i> )  |
| D71881 | GGAC <u>CAATTG</u> ATTGTTCTGA<br>CTATGAACAACAACC     | Used to amplify the <i>rcsB</i> homology region and introduce an <i>MfeI</i> site. Used with D71882. ( <i>rcs</i> )             |
| D71882 | GGAC <u>CCCCGGG</u> GATGGGAATCG<br>TAGGCCG           | Used to amplify the <i>rcsB</i> homology region and introduce an <i>XmaI</i> site. Used with D71881. ( <i>rcs</i> )             |

**Table S2. Oligonucleotides used in this study (continued)**

| Name   | Sequence (5' – 3') <sup>1</sup>          | Use                                                                                                                  |
|--------|------------------------------------------|----------------------------------------------------------------------------------------------------------------------|
| D71883 | GGACGCTAGCTATTTCAACA<br>AATTACATTAAGTAGG | Used to amplify the <i>rcsC</i> homology region and introduce an <i>NheI</i> site. Used with D71884. ( <i>rcs</i> )  |
| D71884 | GGACGAGCTCGCGGTCAGCG<br>ATAATGAC         | Used to amplify the <i>rcsC</i> homology region and introduce a <i>SacI</i> site. Used with D71883. ( <i>rcs</i> )   |
| D72684 | CGGCCAATTGAAGAGCACGA<br>TCGAATGATG       | Used to amplify the <i>ycbW</i> homology region and introduce an <i>MfeI</i> site. Used with D72685. ( <i>ycb</i> )  |
| D72685 | CGGCCCCGGGTTAGACTGCC<br>TGTTGAGG         | Used to amplify the <i>ycbW</i> homology region and introduce an <i>XmaI</i> site. Used with D72684. ( <i>ycb</i> )  |
| D72686 | CGGCGCTAGCCTAACGCGCC<br>AACTTAAG         | Used to amplify the <i>ycbX</i> homology region and introduce an <i>NheI</i> site. Used with D72687. ( <i>ycb</i> )  |
| D72687 | CGGCGAGCTCCTAGCCGCTG<br>TATTTTCACC       | Used to amplify the <i>ycbX</i> homology region and introduce a <i>SacI</i> site. Used with D72686. ( <i>ycb</i> )   |
| D72688 | CGGCCAATTGCTGGCAACCG<br>GTACAGG          | Used to amplify the <i>tam</i> homology region and introduce an <i>MfeI</i> site. Used with D72689. ( <i>tam</i> )   |
| D72689 | CGGCCCCGGGTTTACTCCAT<br>ACGCCGGG         | Used to amplify the <i>tam</i> homology region and introduce an <i>XmaI</i> site. Used with D72688. ( <i>tam</i> )   |
| D72690 | CGGCGCTAGCTATCACGTCA<br>GCTGGTAATG       | Used to amplify the <i>yneE</i> homology region and introduce an <i>NheI</i> site. Used with D72691. ( <i>tam</i> )  |
| D72691 | CGGCGAGCTCTATCTCAAGA<br>CTGAAGATCTTCAG   | Used to amplify the <i>yneE</i> homology region and introduce a <i>SacI</i> site. Used with D72690. ( <i>tam</i> )   |
| D72692 | CGGCCAATTGCAATCATCAT<br>GTCGATTTC        | Used to amplify the <i>nupG</i> homology region and introduce an <i>MfeI</i> site. Used with D72693. ( <i>nupG</i> ) |
| D72693 | CGGCCCCGGGTAATTAGTGG<br>CTAACCGTC        | Used to amplify the <i>nupG</i> homology region and introduce an <i>XmaI</i> site. Used with D72692. ( <i>nupG</i> ) |



**Table S2. Oligonucleotides used in this study (continued)**

| Name   | Sequence (5' – 3') <sup>1</sup>     | Use                                                                                                                                 |
|--------|-------------------------------------|-------------------------------------------------------------------------------------------------------------------------------------|
| D72694 | CGGCGCTAGCCGCAAAGAAA<br>AACGGGTC    | Used to amplify the <i>speC</i> homology region and introduce an <i>NheI</i> site. Used with D72695. ( <i>nupG</i> )                |
| D72695 | CGGCGAGCTCGTGTTGCCGA<br>GCGTTTATAAC | Used to amplify the <i>speC</i> homology region and introduce a <i>SacI</i> site. Used with D72694. ( <i>nupG</i> )                 |
| D72695 | CGGCGAGCTCGTGTTGCCGA<br>GCGTTTATAAC | Used to amplify the <i>speC</i> homology region and introduce a <i>SacI</i> site. Used with D72694. ( <i>nupG</i> )                 |
| D72696 | CAAACAATTGCAGAAATGAT<br>CG          | Used to amplify the <i>aslB</i> homology region and introduce an <i>MfeI</i> site. Used with D72697. ( <i>asl</i> )                 |
| D72697 | CGGCCCGGGGAGATCTGCC<br>TTTGCCG      | Used to amplify the <i>aslB</i> homology region and introduce an <i>XmaI</i> site. Used with D72696. ( <i>asl</i> )                 |
| D72698 | CGGCGCTAGCAGCGATAGCG<br>CCGGCTTAG   | Used to amplify the <i>aslA</i> homology region and introduce an <i>NheI</i> site. Used with D72699. ( <i>asl</i> )                 |
| D72699 | CGGCGAGCTCGGAAAGGGAT<br>GATCCAACCG  | Used to amplify the <i>aslA</i> homology region and introduce a <i>SacI</i> site. Used with D72698. ( <i>asl</i> )                  |
| D72369 | GCCGGCTAGCCTGGCTACAG<br>GAAGGCC     | Used to amplify the <i>lacZ</i> homology region and introduce an <i>NheI</i> site. Used with D72370. ( <i>lac</i> )                 |
| D72370 | GCCGGAGCTCGTTTCGGGTT<br>TTCGACG     | Used to amplify the <i>lacZ</i> homology region and introduce a <i>SacI</i> site. Used with D72369. ( <i>lac</i> )                  |
| D68504 | TACGCAATTGCCATGAAGAC<br>GGTACGCG    | Used to amplify the <i>lacI</i> homology region and introduce an <i>MfeI</i> site. Used with D68505. ( <i>lac</i> )                 |
| D68505 | TACGCCCGGGTCACTGCCCCG<br>CTTCCAG    | Used to amplify the <i>lacI</i> homology region and introduce an <i>XmaI</i> site. Used with D68504. ( <i>lac</i> )                 |
| D72371 | GGACCAATGGTTTCGGGTTT<br>TCGACG      | Used to amplify the <i>inverse lacZ</i> homology region and introduce an <i>MfeI</i> site. Used with D72372. ( <i>Inverse lac</i> ) |

**Table S2. Oligonucleotides used in this study (continued)**

| Name   | Sequence (5' – 3') <sup>1</sup>              | Use                                                                                                                                                 |
|--------|----------------------------------------------|-----------------------------------------------------------------------------------------------------------------------------------------------------|
| D72372 | GGAC <u>CCCCGGG</u> CTGGCTACAG<br>GAAGGCC    | Used to amplify the <i>inverse lacZ</i> homology region and introduce an <i>XmaI</i> site. Used with D72371. ( <i>Inverse lac</i> )                 |
| D71377 | TACGGAGCT <u>CCCATGAAGAC</u><br>GGTACGCG     | Used to amplify the <i>inverse lacI</i> homology region and introduce a <i>SacI</i> site. Used with D71378. ( <i>Inverse lac</i> )                  |
| D71378 | TACGGCTAGCTCACTG <u>CCCCG</u><br>CTTCCAG     | Used to amplify the <i>inverse lacI</i> homology region and introduce an <i>NheI</i> site. Used with D71377. ( <i>Inverse lac</i> )                 |
| D68765 | GGACGCTAGCATGACCATGA<br>TTACGGATTC           | Used to amplify the <i>lacZ (+O<sub>2</sub>)</i> homology region and introduce an <i>NheI</i> site. Used with D68766. ( <i>lac +O<sub>2</sub></i> ) |
| D68766 | GGACGAGCTCCACATATCCT<br>GATCTTCCAG           | Used to amplify the <i>lacZ (+O<sub>2</sub>)</i> homology region and introduce a <i>SacI</i> site. Used with D68765. ( <i>lac +O<sub>2</sub></i> )  |
| D75746 | GCTCAATTGATGAGGCTTAT<br>CTGACGC              | Used to amplify the <i>mntH</i> homology region and introduce an <i>MfeI</i> site. Used with D75747. ( <i>mntH</i> )                                |
| D75747 | GCTCCCGGGGCCAATGGAGC<br>ACAATGC              | Used to amplify the <i>mntH</i> homology region and introduce an <i>XmaI</i> site. Used with D75746. ( <i>mntH</i> )                                |
| D75748 | GCTGCTAGCGGACGCGTTTA<br>ATGGCG               | Used to amplify the <i>ypeC</i> homology region and introduce an <i>NheI</i> site. Used with D75749. ( <i>mntH</i> )                                |
| D75749 | GCTGAGCTCGTGCTGGTGGT<br>AACACG               | Used to amplify the <i>ypeC</i> homology region and introduce a <i>SacI</i> site. Used with D75748. ( <i>mntH</i> )                                 |
| D74762 | CGGCCAATTGCCTGACTCCTT<br>GAGAGTCC            | Used to amplify the <i>aspU</i> homology region and introduce an <i>MfeI</i> site. Used with D74763. ( <i>dkgB</i> )                                |
| D74763 | CGGCC <u>CCCCGGG</u> GAAAAAAAAA<br>CCTCGAGCG | Used to amplify the <i>aspU</i> homology region and introduce an <i>XmaI</i> site. Used with D74762. ( <i>dkgB</i> )                                |
| D74764 | CGGCGCTAGCGTCTGTATAT<br>CTATTATTGCCAG        | Used to amplify the <i>dkgB</i> homology region and introduce an <i>NheI</i> site. Used with D74765. ( <i>dkgB</i> )                                |

**Table S2. Oligonucleotides used in this study (continued)**

| Name   | Sequence (5' – 3') <sup>1</sup>      | Use                                                                                                                               |
|--------|--------------------------------------|-----------------------------------------------------------------------------------------------------------------------------------|
| D74765 | CGGCGAGCTCAAATACCGAT<br>CTCACGC      | Used to amplify the <i>dkgB</i> homology region and introduce a <i>SacI</i> site. Used with D74764. ( <i>dkgB</i> )               |
| D74746 | CGGCCAATTGGTGATTGATT<br>ATAAAAAAACC  | Used to amplify the <i>yqeJ</i> homology region and introduce an <i>MfeI</i> site. Used with D74747. ( <i>yqe</i> )               |
| D74747 | CGGCCCCCGGGATGTATTTTA<br>GTTTACCTTGC | Used to amplify the <i>yqeJ</i> homology region and introduce an <i>XmaI</i> site. Used with D74746. ( <i>yqe</i> )               |
| D74748 | CGGCGCTAGCAACAAAAAGA<br>TGGAACCTCG   | Used to amplify the <i>yqeL</i> homology region and introduce an <i>NheI</i> site. Used with D74749. ( <i>yqe</i> )               |
| D74749 | CGGCGAGCTCCACGAAAAAG<br>AAACCAAGG    | Used to amplify the <i>yqeL</i> homology region and introduce a <i>SacI</i> site. Used with D74748. ( <i>yqe</i> )                |
| D74750 | CGGCCAATTGCAAAAAATT<br>GCCTGGACCAG   | Used to amplify the <i>yghT</i> homology region and introduce an <i>MfeI</i> site. Used with D74751. ( <i>pitB</i> )              |
| D74751 | CGGCCCCCGGGCTGGCGATCG<br>GGCATTTC    | Used to amplify the <i>yghT</i> homology region and introduce an <i>XmaI</i> site. Used with D74750. ( <i>pitB</i> )              |
| D74752 | CGGCGCTAGCGACCGGGCAT<br>TTTCAGG      | Used to amplify the <i>pitB</i> homology region and introduce an <i>NheI</i> site. Used with D74753. ( <i>pitB</i> )              |
| D74753 | CGGCGAGCTCGAAACTGCCA<br>GGCGTCAG     | Used to amplify the <i>pitB</i> homology region and introduce a <i>SacI</i> site. Used with D74752. ( <i>pitB</i> )               |
| D75191 | GGACCAATTGGATTTGCTGT<br>ACTTTATTC    | Used to amplify the upstream <i>ΔeaeH</i> homology region and introduce an <i>MfeI</i> site. Used with D75192. ( <i>ΔeaeH</i> )   |
| D75192 | GGACCCCGGGATATCTATTA<br>TTCTCCCG     | Used to amplify the upstream <i>ΔeaeH</i> homology region and introduce an <i>XmaI</i> site. Used with D71373. ( <i>ΔeaeH</i> )   |
| D76797 | GCCGGCTAGCGGCCTGTGTC<br>CATATTACG    | Used to amplify the downstream homology <i>ΔeaeH</i> region and introduce an <i>NheI</i> site. Used with D71376. ( <i>ΔeaeH</i> ) |

**Table S2. Oligonucleotides used in this study (continued)**

| Name   | Sequence (5' – 3') <sup>1</sup>   | Use                                                                                                                               |
|--------|-----------------------------------|-----------------------------------------------------------------------------------------------------------------------------------|
| D76798 | GCCGGAGCTCCACCGCGAAA<br>TCTATGC   | Used to amplify the downstream <i>ΔeaeH</i> homology region and introduce a <i>SacI</i> site. Used with D71375. ( <i>ΔeaeH</i> )  |
| D75195 | GGACCAATTGTGAGTTCAGA<br>GAGCCGC   | Used to amplify the upstream <i>ΔyafT</i> homology region and introduce an <i>MfeI</i> site. Used with D75196. ( <i>ΔyafT</i> )   |
| D75196 | GGACCCCGGGATCCTCTTCG<br>GATACGG   | Used to amplify the upstream <i>ΔyafT</i> homology region and introduce an <i>XmaI</i> site. Used with D75195. ( <i>ΔyafT</i> )   |
| D75197 | GCCGGCTAGCGTTAAGACGT<br>AAGATGCG  | Used to amplify the downstream homology <i>ΔyafT</i> region and introduce an <i>NheI</i> site. Used with D75198. ( <i>ΔyafT</i> ) |
| D75198 | GCCGGAGCTCTGCTACGACT<br>TACGTTTTC | Used to amplify the downstream <i>ΔyafT</i> homology region and introduce a <i>SacI</i> site. Used with D75197. ( <i>ΔyafT</i> )  |
| D76801 | GGACCAATTGAAATATGCCT<br>GAGCAGC   | Used to amplify the upstream <i>Δyqe</i> homology region and introduce an <i>MfeI</i> site. Used with D76802. ( <i>Δyqe</i> )     |
| D76802 | GGACCCCGGGTTCCGTAAGT<br>GAGTTGG   | Used to amplify the upstream <i>Δyqe</i> homology region and introduce an <i>XmaI</i> site. Used with D76801. ( <i>Δyqe</i> )     |
| D76803 | GCCGGCTAGCTTGTCTGGAG<br>ATTCAGG   | Used to amplify the downstream homology <i>Δyqe</i> region and introduce an <i>NheI</i> site. Used with D76804. ( <i>Δyqe</i> )   |
| D76804 | GCCGGAGCTCCAAGCAATCA<br>ACACTGG   | Used to amplify the downstream <i>Δyqe</i> homology region and introduce a <i>SacI</i> site. Used with D76803. ( <i>Δyqe</i> )    |
| D76805 | GGACCAATTGATCGTTTGAT<br>TTTGTCG   | Used to amplify the upstream <i>ΔpitB</i> homology region and introduce an <i>MfeI</i> site. Used with D76806. ( <i>ΔpitB</i> )   |
| D76806 | GGACCCCGGGAAAAATGTTA<br>AGGCAGC   | Used to amplify the upstream <i>ΔpitB</i> homology region and introduce an <i>XmaI</i> site. Used with D76805. ( <i>ΔpitB</i> )   |
| D76807 | GTTTCGCTAGCTTCGCGG                | Used to amplify the downstream homology <i>ΔpitB</i> region and introduce an <i>NheI</i> site. Used with D76808. ( <i>ΔpitB</i> ) |

**Table S2. Oligonucleotides used in this study (continued)**

| Name                             | Sequence (5' – 3') <sup>1</sup> | Use                                                                                                                                    |
|----------------------------------|---------------------------------|----------------------------------------------------------------------------------------------------------------------------------------|
| D76808                           | GCCGGAGCTCAATGCTGGTA<br>CTGGTGG | Used to amplify the downstream <i>ΔpitB</i> homology region and introduce a <i>SacI</i> site. Used with D76807. ( <i>ΔpitB</i> )       |
| <i>Used to screen candidates</i> |                                 |                                                                                                                                        |
| D54890                           | TGAAGGGCAATCAGCTGTTG            | Anneals to 3' end of <i>lacI</i> gene, upstream of cloning site in pKH3. Used for sequencing inserts in pKH3.                          |
| D55668                           | GAGCGGCGACGATAGTCATG            | Anneals downstream of <i>SalI</i> site in pBR322. Used for sequencing inserts in pBR322 during construction of pKH3.                   |
| D10520                           | CCCTGCGGTGCCCTCAAG              | Anneals upstream of <i>EcoRI</i> site in pRW50. Used for sequencing and amplification of inserts in this vector.                       |
| D56613                           | CTTGATGTCTCTGACCAGAC            | Anneals within the <i>lacI</i> sequence outside of the pKH3 homology. Used for screening gene gorging candidates by PCR amplification. |
| D56614                           | TTATGCAGCAACGAGACGTC            | Anneals within the <i>lacZ</i> sequence outside of the pKH3 homology. Used for screening gene gorging candidates by PCR amplification. |
| D68556                           | TTTACGTCGCCGTCCAG               | Anneals downstream of the start codon of <i>gfp</i> . Used for sequencing promoter inserts in pJB3 derivatives and BRY strains.        |
| D69747                           | GTCGCACAGAACATCGG               | Anneals to <i>thiQ</i> gene outside of the homology regions used. Used for PCR screening with D69748. ( <i>thiQ</i> )                  |
| D69748                           | TCGCTGGTCATTTCTGAAG             | Anneals to <i>yabI</i> gene outside of the homology regions used. Used for PCR screening with D69747. ( <i>thiQ</i> )                  |
| D69751                           | TATCGCCTCAATGGTGACA             | Anneals to <i>melB</i> gene outside of the homology regions used. Used for PCR screening with D69752. ( <i>mel</i> )                   |
| D69752                           | TTGCCACCGCCAGAC                 | Anneals to <i>yjdF</i> gene outside of the homology regions used. Used for PCR screening with D69751. ( <i>mel</i> )                   |
| D71835                           | GGAAACCATTATGCAGGAGG            | Anneals to <i>yafT</i> gene outside of the homology regions used. ( <i>yafT</i> )                                                      |

**Table S2. Oligonucleotides used in this study (continued)**

| Name   | Sequence (5' – 3') <sup>1</sup> | Use                                                                                                                    |
|--------|---------------------------------|------------------------------------------------------------------------------------------------------------------------|
| D71836 | TTTCCTGCATTCAATGC               | Anneals to <i>ykfM</i> gene outside of the homology regions used. Used for PCR screening with D71835. ( <i>yafT</i> )  |
| D71837 | AATTTACAGTCCGATGAAGG            | Anneals to <i>eaeH</i> gene upstream of the homology regions used. Used for PCR screening with D71838. ( <i>eaeH</i> ) |
| D71838 | TTTCAGATAATCGCGCC               | Anneals to <i>eaeH</i> gene upstream of the homology regions used. Used for PCR screening with D71837. ( <i>eaeH</i> ) |
| D72064 | GCGCCATTTCCCAAGCC               | Anneals to <i>rcsB</i> gene upstream of the homology regions used. Used for PCR screening with D72065. ( <i>rcs</i> )  |
| D72065 | CGCTCTGCCGTCAACGG               | Anneals to <i>rcsC</i> gene upstream of the homology regions used. Used for PCR screening with D72064. ( <i>rcs</i> )  |
| D72901 | GTGCTTTGCCAGACTGC               | Anneals to <i>tam</i> gene outside of the homology regions used. Used for PCR screening with D72902. ( <i>tam</i> )    |
| D72902 | TGACATTACGCAAACAGCC             | Anneals to <i>yneE</i> gene outside of the homology regions used. Used for PCR screening with D72901. ( <i>tam</i> )   |
| D72903 | ATCCGATGTTTGCCAGC               | Anneals to <i>nupG</i> gene outside of the homology regions used. Used for PCR screening with D72904. ( <i>nupG</i> )  |
| D72904 | GCATAATGAACAGCATATTG<br>AGG     | Anneals to <i>speC</i> gene outside of the homology regions used. Used for PCR screening with D72903. ( <i>nupG</i> )  |
| D72905 | CACTATGTTTATCCGCAATAT<br>CG     | Anneals to <i>aslB</i> gene outside of the homology regions used. Used for PCR screening with D72906. ( <i>asl</i> )   |
| D72906 | TCGCGTACCGACTTTTCG              | Anneals to <i>aslC</i> gene outside of the homology regions used. Used for PCR screening with D72905. ( <i>asl</i> )   |
| D72907 | GGCAGATGCGAATTAAACC             | Anneals to <i>ycbW</i> gene outside of the homology regions used. Used for PCR screening with D72908. ( <i>ycb</i> )   |

**Table S2. Oligonucleotides used in this study (continued)**

| Name   | Sequence (5' – 3') <sup>1</sup> | Use                                                                                                                                         |
|--------|---------------------------------|---------------------------------------------------------------------------------------------------------------------------------------------|
| D72908 | TCGCATTGGTGATGTGG               | Anneals to <i>ycbX</i> gene outside of the homology regions used. Used for PCR screening with D72907. ( <i>ycb</i> )                        |
| D76493 | GCTACAGCTGCGGCGGC               | Anneals to <i>mntH</i> gene outside of the homology regions used. Used for PCR screening with D76494. ( <i>mntH</i> )                       |
| D76494 | GCGGCAATAACCGTTTCTTG<br>CG      | Anneals to <i>ypeC</i> gene outside of the homology regions used. Used for PCR screening with D76493. ( <i>mntH</i> )                       |
| D75808 | AGTGGACGCATCACTGG               | Anneals to <i>aspU</i> gene outside of the homology regions used. Used for PCR screening with D75809. ( <i>dkgB</i> )                       |
| D75809 | CCTCATCTTTCAGGGCC               | Anneals to <i>dkgB</i> gene outside of the homology regions used. Used for PCR screening with D75808. ( <i>dkgB</i> )                       |
| D75800 | AGCGCATTTGTCATAGG               | Anneals to <i>yqeJ</i> gene outside of the homology regions used. Used for PCR screening with D75801. ( <i>yqe</i> )                        |
| D75801 | TTTCTCTCATTTGATTAGAGC           | Anneals to <i>yqeL</i> gene outside of the homology regions used. Used for PCR screening with D75800. ( <i>yqe</i> )                        |
| D75802 | ACACCTCCATTAATTGC               | Anneals to <i>yghT</i> gene outside of the homology regions used. Used for PCR screening with D75803. ( <i>pitB</i> )                       |
| D75803 | ACACTACCTGCAACAGC               | Anneals to <i>pitB</i> gene outside of the homology regions used. Used for PCR screening with D75802. ( <i>pitB</i> )                       |
| D75810 | ACCTGACAGCGTGTATTCC             | Check primer for <i>ΔeaeH</i> , which anneals outside of the homology regions used. Used for PCR screening. ( <i>ΔeaeH</i> )                |
| D75812 | CATTACAAACGGAGTCTGG             | Check primer for <i>ΔyafT</i> , which anneals upstream of the homology regions used. Used for PCR screening with D75813. ( <i>ΔyafT</i> )   |
| D75813 | AAAACCGTTGACGAAGG               | Check primer for <i>ΔyafT</i> , which anneals downstream of the homology regions used. Used for PCR screening with D75812. ( <i>ΔyafT</i> ) |

**Table S2. Oligonucleotides used in this study (continued)**

| Name                             | Sequence (5' – 3') <sup>1</sup> | Use                                                                                                                                         |
|----------------------------------|---------------------------------|---------------------------------------------------------------------------------------------------------------------------------------------|
| D77712                           | GTCTTTCATCACAACCTC<br>G         | Check primer for <i>Δyqe</i> , which anneals upstream of the homology regions used. Used for PCR screening with D77713. ( <i>Δyqe</i> )     |
| D77713                           | GGTCTTTACCTTGATCTCC             | Check primer for <i>Δyqe</i> , which anneals downstream of the homology regions used. Used for PCR screening with D77712. ( <i>Δyqe</i> )   |
| D77714                           | GGAGATTTGGTTTTTCATG<br>C        | Check primer for <i>ΔpitB</i> , which anneals upstream of the homology regions used. Used for PCR screening with D77715. ( <i>ΔpitB</i> )   |
| D77715                           | TTGCGCTGATTGTTTCC               | Check primer for <i>ΔpitB</i> , which anneals downstream of the homology regions used. Used for PCR screening with D77714. ( <i>ΔpitB</i> ) |
| <i>Used for qPCR</i>             |                                 |                                                                                                                                             |
| <i>bglB</i><br><i>upstream</i>   | GTCGTTACACGCGCCATT<br>CAC       | Anneals to the <i>bglB</i> gene. Used with <i>bglB</i> downstream as an internal control for qPCR                                           |
| <i>bglB</i><br><i>downstream</i> | AACCAGCCCACCGAGAA<br>GC         | Anneals to the <i>bglB</i> gene. Used with <i>bglB</i> upstream as an internal control for qPCR                                             |
| <i>gfp</i><br><i>upstream</i>    | GCGACGTAAACGGCCAC<br>AAG        | Anneals to the <i>gfp</i> gene. Used with <i>gfp</i> downstream for qPCR                                                                    |
| <i>gfp</i><br><i>downstream</i>  | GTAGCGGGCGAAGCACT<br>G          | Anneals to the <i>gfp</i> gene. Used with <i>gfp</i> upstream for qPCR                                                                      |

<sup>1</sup>Target sites for restriction endonucleases are underlined.

## References

1. Lee, D.J., Bingle, L.E., Heurlier, K., Pallen, M.J., Penn, C.W., Busby, S.J. and Hobman, J.L. (2009) Gene doctoring: a method for recombineering in laboratory and pathogenic *Escherichia coli* strains. *BMC Microbiol*, **9**, 252.
2. Hollands, K. (2009), University of Birmingham, Birmingham.
3. Corcoran, C.P., Cameron, A.D. and Dorman, C.J. (2010) H-NS silences *gfp*, the green fluorescent protein gene: *gfpTCD* is a genetically Remastered *gfp* gene with reduced susceptibility to H-NS-mediated transcription silencing and with enhanced translation. *J Bacteriol*, **192**, 4790-4793.
4. Blattner, F.R., Plunkett, G., 3rd, Bloch, C.A., Perna, N.T., Burland, V., Riley, M., Collado-Vides, J., Glasner, J.D., Rode, C.K., Mayhew, G.F. *et al.* (1997) The complete genome sequence of *Escherichia coli* K-12. *Science*, **277**, 1453-1462.
